# Supplementary material for: Prevalence and predictors of water-borne diseases among elderly people in India: evidence from Longitudinal Ageing Study in India, 2017–18
Source: Springer Nature journal article supplement (doi:10.1186/s12889-022-13376-6), 2022-05-17
Supplement: MOESM1 [file 20422128]

**Table-A1.** VIF score to check multicollinearity.

| <b>Variables</b>         | <b>VIF</b> |
|--------------------------|------------|
| Age (in years)           | 1.12       |
| Sex                      | 1.54       |
| Education                | 1.43       |
| Marital status           | 1.21       |
| Working status           | 1.39       |
| Body Mass Index          | 1.07       |
| Type of toilet facility  | 1.24       |
| Source of drinking water | 1.03       |
| Type of House            | 1.33       |
| MPCE quintile            | 1.16       |
| Religion                 | 1.08       |
| Caste                    | 1.16       |
| Place of residence       | 1.34       |
| Region                   | 1.06       |

VIF: Variance Inflation Factor

**Table-A2** Percentage of older adults suffered from water borne diseases in states of India (rural and urban)

| <b>States</b>        | <b>Rural (%)</b> | <b>Urban (%)</b> | <b>p-value</b> |
|----------------------|------------------|------------------|----------------|
| Jammu & Kashmir      | 10.4             | 6.6              | 0.001          |
| Himachal Pradesh     | 28.7             | 32.9             | 0.001          |
| Punjab               | 22.0             | 23.9             | 0.108          |
| Chandigarh           | 0.0              | 11.5             | 0.001          |
| Uttarakhand          | 11.6             | 14.2             | 0.001          |
| Haryana              | 35.2             | 32.4             | 0.001          |
| Delhi                | 0.0              | 17.5             | 0.001          |
| Rajasthan            | 34.9             | 25.3             | 0.001          |
| Uttar Pradesh        | 33.6             | 26.7             | 0.001          |
| Bihar                | 33.7             | 36.3             | 0.001          |
| Arunachal Pradesh    | 24.6             | 9.9              | 0.001          |
| Nagaland             | 1.2              | 2.8              | 0.001          |
| Manipur              | 19.7             | 24.1             | 0.001          |
| Mizoram              | 34.5             | 36.1             | 0.001          |
| Tripura              | 13.5             | 8.6              | 0.001          |
| Meghalaya            | 9.5              | 5.5              | 0.001          |
| Assam                | 12.6             | 7.2              | 0.001          |
| West Bengal          | 14.9             | 10.1             | 0.001          |
| Jharkhand            | 18.1             | 12.5             | 0.001          |
| Odisha               | 11.1             | 8.1              | 0.001          |
| Chhattisgarh         | 38.5             | 30.4             | 0.001          |
| Madhya Pradesh       | 36.0             | 26.1             | 0.001          |
| Gujarat              | 22.3             | 14.5             | 0.001          |
| Daman & Diu          | 20.1             | 12.8             | 0.001          |
| Dadra & Nagar Haveli | 44.9             | 42.0             | 0.001          |
| Maharashtra          | 12.8             | 4.9              | 0.001          |
| Andhra Pradesh       | 9.4              | 3.3              | 0.001          |

|                          |             |             |              |
|--------------------------|-------------|-------------|--------------|
| Karnataka                | 14.5        | 1.9         | 0.001        |
| Goa                      | 8.6         | 4.1         | 0.001        |
| Lakshadweep              | 7.3         | 1.5         | 0.001        |
| Kerala                   | 3.9         | 3.5         | 0.665        |
| Tamil Nadu               | 7.7         | 5.0         | 0.567        |
| Puducherry               | 8.9         | 1.7         | 0.001        |
| Andaman & Nicobar Island | 26.0        | 18.2        | 0.001        |
| Telangana                | 8.8         | 8.3         | 0.287        |
| <b>India</b>             | <b>22.5</b> | <b>12.2</b> | <b>0.001</b> |
